# Supplementary material
Source: MDPI journal article supplement (https://www.mdpi.com/2227-9717/11/4/1002)

# Composites of Layered Double Hydroxides and ANA-Type Zeolite Synthesized from Hazardous Secondary Aluminum Dross for Cationic Dye Wastewater Treatment

Bin Zhu <sup>1,\*</sup>, Lina Wang <sup>2</sup>, Guo Li <sup>2</sup> and Qiang Jin <sup>1</sup>

<sup>1</sup> School of Environmental Science and Engineering, Shanghai Jiao Tong University, Shanghai 200240, China

<sup>2</sup> China Communications Construction Sinobioway Environmental Protection Co., Ltd., Jinan 250000, China

\* Correspondence: zhubin912@sjtu.edu.cn; Tel.: +81-021-54741065

**Table S1** Metallic contents of MgAl-LDHs, ANA, and LDHs@ANA

| Sample    | Al wt% | Mg wt% | Na wt% | Fe wt% | Ca wt% |
|-----------|--------|--------|--------|--------|--------|
| MgAl-LDHs | 8.905  | 29.402 | 0.411  | 0.066  | 0.349  |
| ANA       | 11.193 | -      | 12.059 | 0.028  | 0.367  |
| LDHs@ANA  | 17.042 | 16.828 | 0.467  | 0.014  | 0.402  |

**Figure S1.** Plots of pseudo-second-order (a) model and pseudo-first-order (b).

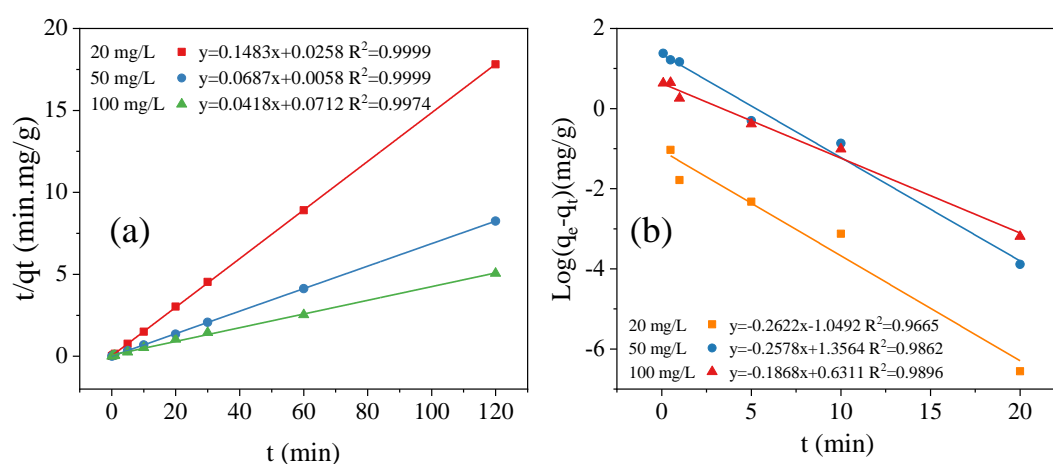

Supplement: s1 [file s1]
